# Supplementary material for: A novel data-driven analytical framework on hierarchical water allocation integrated with blue and virtual water transfers
Source: Copernicus journal article supplement (doi:10.5194/hess-2019-389), 2019-08-22
Supplement: Supplementary file [file hess-2019-389-AC2-supplement.pdf]

## Appendix A: Notations

The following notations are used to develop the model.

### Indexes:

$k$  : crop indicators,  $k = 1$  for wheat,  $k = 2$  for maize,  $k = 3$  for sunflower

$i$  : water usage indicator,  $i = 1$  for agricultural sector,  $i = 2$  for industrial sector,  $i = 3$  for domestic sector,  $i = 4$  for ecological sectors

### Parameters:

$p_i$  : water price set by the leader for sectoral water uses, RMB/m<sup>3</sup>

$ERW_i$  : economic return per unit of water consumption in sectors,  $i = 1,2,3$ , RMB/m<sup>3</sup>

$ERP_k$  : economic return from agricultural products exports,  $i = 1$ , where  $ERP_k = ERW_k \times VW_k$ , RMB/m<sup>3</sup>

$c_k$  : economic costs because of agricultural products imports RMB/kg

TC : transaction cost per unit of water resource from agricultural sector to industrial or domestic sectors RMB/m<sup>3</sup>

$\mu$  : the irrigation coefficient, which presents the utilization effectiveness of irrigation water

$A$  : total available area for crop planting, hm<sup>2</sup>

$\phi_{ind}$  : the gross industrial output value, RMB

$R_k$  : effective rainfall, mm

$\varpi_k$  : crop  $k$  consumption per unit in the Hetao irrigation area, kg/person

### Auxiliary variables (continuous variables)

AW : maximum volume of available water in Hetao irrigation district, m<sup>3</sup>

PTI : price of water transfers to industrial sector, RMB/m<sup>3</sup>

PTD : price of water transfers to domestic sector, RMB/m<sup>3</sup>

$w_k$  : water irrigation for crop  $k$ , /m<sup>3</sup>

$W_k$  represents the blue and green water components in crop  $k$ , m<sup>3</sup>

$y_k$  represents the crop yield per unit of irrigation area, kg/hm<sup>2</sup>

$l_k$  : total yield of crop  $k$ , kg

$VW_k$  : virtual water content of crop  $k$ , m<sup>3</sup> kg<sup>-1</sup>

$A_{1k}$  : area allocated to crop  $k$ , hm<sup>2</sup>

$d_i$  : water demand of sectors,  $i = 1,2,3,4$ , m<sup>3</sup>

$d_{1k}$  : water demand of crops in agricultural sector,  $k = 1,2,3$ , m<sup>3</sup>

$\phi_{pop}$  : per capita disposable income, RMB

POP: population in the Hetao irrigation area

### Decision variables (continuous variables)

$X_i$  : initial water rights in sectors,  $i = 1,2,3,4$ , determined by the upper-level decision maker, m<sup>3</sup>

$EM_k$ : quantity of products exports, determined by the upper-level decision maker, kg

$IM_k$ : quantity of products imports from international trade, determined by the upper-level decision maker, kg

WTI : water transfer from agricultural sector to industrial sector, determined by the lower-level decision makers,  $m^3$

WTD : water transfer from agricultural sector to domestic sector, determined by the lower-level decision makers,  $m^3$

$x_{1k}$  : water irrigated to crop  $k$  in the agricultural sector, determined by the lower-level decision maker,  $\sum_{k=1}^3 x_{1k} = X_1, m^3$
